# Supplementary material
Source: MDPI journal article supplement (https://www.mdpi.com/2073-445X/11/4/567)
Supplement: s1 [file s1]

## Supplementary Materials

Table S1. List of Countries in which the Japanese beetle was observed.

| Continent    | Infested State       | Infested Territories                  | Regulatory Status Category       | Surface km <sup>2</sup> |
|--------------|----------------------|---------------------------------------|----------------------------------|-------------------------|
| Asia         | India                | Kerala                                | Present, no details              | 38,863                  |
|              | Japan                | Hokkaido                              | Present, no details              | 83,454                  |
|              | Japan                | Honshu                                | Present, no details              | 227,960                 |
|              | Japan                | Kyushu                                | Present, no details              | 36,782                  |
|              | Russia               | Kunaschir islands                     | Present, restricted distribution | 10,503.2                |
|              | Japan                | Shikoku                               | Present, no details              | 18,800                  |
| <b>Total</b> |                      |                                       |                                  | <b>416,362.2</b>        |
| Europe       | Italy                | Piemonte                              | Present, restricted distribution | 25,387                  |
|              | Italy                | Lombardia                             | Present, restricted distribution | 23,844                  |
|              | Portugal             | Azores islands                        | no detail                        | 2346                    |
|              | Switzerland          | Municipality of Genestrerio-Mendrisio | Present, restricted distribution | 100.9                   |
| <b>Total</b> |                      |                                       |                                  | <b>62,181.1</b>         |
| U.S.A.       | Connecticut          |                                       | Present, restricted distribution | 14,357                  |
|              | Delaware             |                                       | Present, restricted distribution | 5133                    |
|              | District of Columbia |                                       | Present, restricted distribution | 177                     |
|              | Georgia              |                                       | Present, restricted distribution | 69,700                  |
|              | Illinois             |                                       | Present, restricted distribution | 149,998                 |
|              | Indiana              |                                       | Present, restricted distribution | 94,322                  |
|              | Iowa                 |                                       | Present, restricted distribution | 144,669                 |
|              | Kentucky             |                                       | Present, restricted distribution | 104,659                 |
|              | Maine                |                                       | Present, restricted distribution | 91,646                  |
|              | Maryland             |                                       | Present, restricted distribution | 32,134                  |
|              | Massachusetts        |                                       | Present, restricted distribution | 27,363                  |
|              | Michigan             |                                       | Present, restricted distribution | 250,493                 |
|              | Minnesota            |                                       | Present, restricted distribution | 225,181                 |

|                             |                      |                                  |                    |
|-----------------------------|----------------------|----------------------------------|--------------------|
|                             | Missouri             | Present, restricted distribution | 180,561            |
|                             | New Hampshire        | Present, restricted distribution | 24,214             |
|                             | New Jersey           | Present, restricted distribution | 22,591             |
|                             | New York             | Present, restricted distribution | 783.8              |
|                             | North Carolina       | Present, restricted distribution | 13,939             |
|                             | Ohio                 | Present, restricted distribution | 116,096            |
|                             | Pennsylvania         | Present, restricted distribution | 119,282            |
|                             | Rhode Island         | Present, restricted distribution | 3144               |
|                             | South Carolina       | Present, restricted distribution | 82,931             |
|                             | Tennessee            | Present, restricted distribution | 109,247            |
|                             | Vermont              | Present, restricted distribution | 24,905             |
|                             | Virginia             | Present, restricted distribution | 110,786            |
|                             | West Virginia        | Present, restricted distribution | 62,259             |
|                             | Wisconsin            | Present, restricted distribution | 169,639            |
|                             | Alabama              | Present, few occurrences         | 135,765            |
|                             | Arkansas             | Present, few occurrences         | 137,733            |
|                             | Colorado             | Present, few occurrences         | 269,837            |
|                             | Kansas               | Present, few occurrences         | 213,099            |
|                             | Mississippi          | Present, few occurrences         | 125,433            |
|                             | Nebraska             | Present, few occurrences         | 200,356            |
|                             | Oklahoma             | Present, few occurrences         | 181,037            |
|                             | South Dakota         | Present, few occurrences         | 199,730            |
|                             | Texas                | Present, few occurrences         | 695,662            |
|                             | New Brunswick        | Partially or generally infested  | 72,908             |
|                             | Nova Scotia          | Partially or generally infested  | 55,284             |
| <b>Canada</b>               | Ontario              | Partially or generally infested  | 1,076,000          |
|                             | Prince Edward Island | Partially or generally infested  | 5660               |
|                             | Quebec               | Partially or generally infested  | 484.1              |
| <b>Totale North America</b> |                      |                                  | <b>5,619,197.9</b> |

Table S2. Proportion of land use variables under current (2010–2020) and future (2050) conditions (mean  $\pm$  standard deviation). Difference between mean future and current conditions is also shown.

| Region | Land use variable               | Current             | Future              | Future - Current |
|--------|---------------------------------|---------------------|---------------------|------------------|
| Europe | Bare areas                      | 6.952 $\pm$ 22.724  | 6.759 $\pm$ 21.551  | -0.193           |
|        | Croplands                       | 34.616 $\pm$ 40.889 | 26.844 $\pm$ 34.923 | -7.772           |
|        | Grasslands, scrubs, shrubs      | 10.375 $\pm$ 20.942 | 16.908 $\pm$ 24.399 | 6.533            |
|        | Shannon habitat diversity Index | 0.747 $\pm$ 0.597   | 0.926 $\pm$ 0.562   | 0.179            |
|        | Sparse vegetation               | 6.219 $\pm$ 19.098  | 7.181 $\pm$ 19.056  | 0.962            |
|        | Human settlements               | 1.618 $\pm$ 7.306   | 1.316 $\pm$ 5.284   | -0.302           |
|        | Waters                          | 9.054 $\pm$ 23.287  | 5.8 $\pm$ 16.647    | -3.254           |
|        | Wetlands                        | 4.706 $\pm$ 14.675  | 3.624 $\pm$ 10.542  | -1.082           |
| Asia   | Bare areas                      | 14.104 $\pm$ 32.633 | 13.603 $\pm$ 31.709 | -0.501           |
|        | Croplands                       | 20.402 $\pm$ 34.962 | 14.831 $\pm$ 28.842 | -5.571           |
|        | Grasslands, scrubs, shrubs      | 14.457 $\pm$ 26.084 | 20.012 $\pm$ 28.65  | 5.555            |
|        | Shannon habitat diversity Index | 0.639 $\pm$ 0.59    | 0.715 $\pm$ 0.569   | 0.076            |
|        | Sparse vegetation               | 7.552 $\pm$ 20.823  | 8.783 $\pm$ 22.048  | 1.231            |
|        | Human settlements               | 0.752 $\pm$ 5.533   | 0.685 $\pm$ 4.693   | -0.067           |
|        | Waters                          | 8.72 $\pm$ 22.246   | 4.694 $\pm$ 13.947  | -4.026           |
|        | Wetlands                        | 2.928 $\pm$ 11.988  | 2.452 $\pm$ 9.725   | -0.476           |
| Africa | Bare areas                      | 40.075 $\pm$ 47.577 | 39.811 $\pm$ 47.284 | -0.264           |
|        | Croplands                       | 19.846 $\pm$ 34.084 | 13.86 $\pm$ 27.518  | -5.986           |
|        | Grasslands, scrubs, shrubs      | 16.321 $\pm$ 30.973 | 21.901 $\pm$ 34.041 | 5.58             |

|                           |                                 |                 |                 |         |
|---------------------------|---------------------------------|-----------------|-----------------|---------|
|                           | Shannon habitat diversity Index | 0.388 ± 0.505   | 0.42 ± 0.494    | 0.032   |
|                           | Sparse vegetation               | 2.63 ± 12.37    | 3.203 ± 13.316  | 0.573   |
|                           | Human settlements               | 0.3 ± 3.534     | 0.338 ± 3.417   | 0.038   |
|                           | Waters                          | 1.741 ± 11.231  | 1.313 ± 9.135   | -0.428  |
|                           | Wetlands                        | 1.434 ± 8.923   | 1.367 ± 8.184   | -0.067  |
| North America             | Bare areas                      | 15.867 ± 34.202 | 15.323 ± 33.219 | -0.544  |
|                           | Croplands                       | 20.019 ± 34.989 | 14.832 ± 29.176 | -5.187  |
|                           | Grasslands, scrubs, shrubs      | 14.473 ± 25.887 | 19.989 ± 28.363 | 5.516   |
|                           | Shannon habitat diversity Index | 0.649 ± 0.592   | 0.734 ± 0.571   | 0.085   |
|                           | Sparse vegetation               | 8.635 ± 22.17   | 10.033 ± 23.322 | 1.398   |
|                           | Human settlements               | 0.795 ± 5.69    | 0.724 ± 4.815   | -0.071  |
|                           | Waters                          | 9.209 ± 22.694  | 4.913 ± 14.007  | -4.296  |
|                           | Wetlands                        | 2.66 ± 11.363   | 2.212 ± 9.047   | -0.448  |
| Central and South America | Bare areas                      | 2.846 ± 14.598  | 2.517 ± 13.336  | -0.329  |
|                           | Croplands                       | 27.352 ± 36.747 | 16.447 ± 26.753 | -10.905 |
|                           | Grasslands, scrubs, shrubs      | 18.812 ± 27.914 | 28.683 ± 31.639 | 9.871   |
|                           | Shannon habitat diversity Index | 0.642 ± 0.575   | 0.694 ± 0.538   | 0.052   |
|                           | Sparse vegetation               | 4.748 ± 17.236  | 4.752 ± 16.403  | 0.004   |
|                           | Human settlements               | 0.472 ± 4.481   | 0.379 ± 3.494   | -0.093  |
|                           | Waters                          | 4.437 ± 16.53   | 2.531 ± 10.586  | -1.906  |
|                           | Wetlands                        | 3.392 ± 13.707  | 3.019 ± 12.17   | -0.373  |

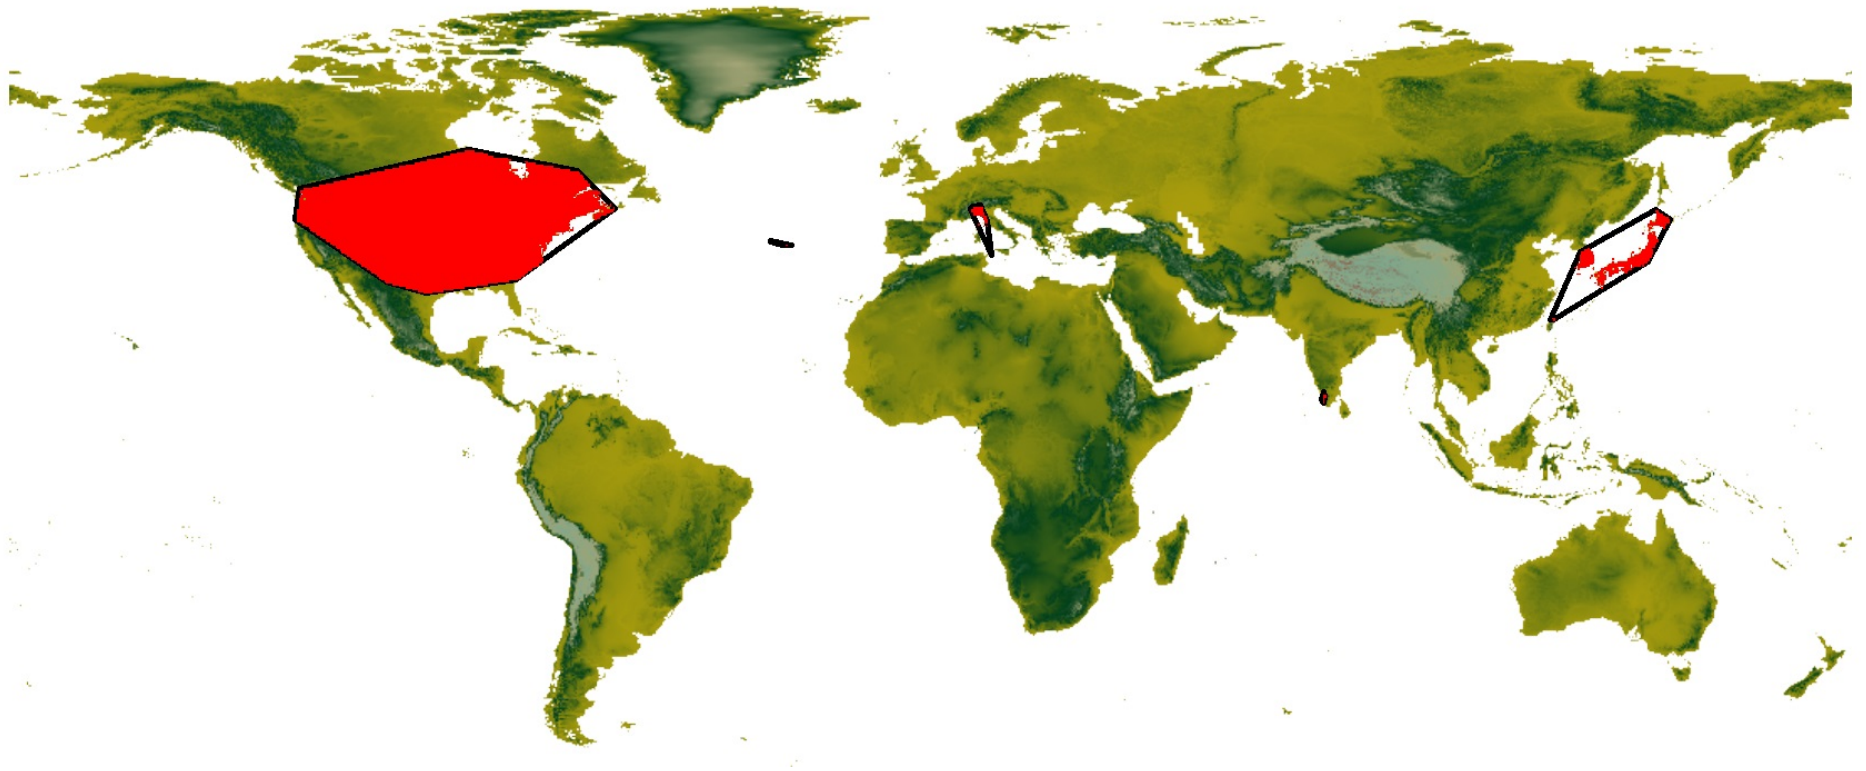

Figure S1. Minimum convex polygons, delimited with black lines and corresponding surfaces above sea level in red, estimated around locations of the Japanese beetle.
